# Supplementary material for: Li-doped 2D aza-fused covalent organic framework: a promising avenue for hydrogen storage
Source: Royal Society of Chemistry journal article supplement (doi:10.1039/d4se01808g), 2025-01-01
Supplement: d4se01808g1.pdf [file d4se01808g1.pdf]

## Supporting Information

### **Li-Doped 2D Aza-Fused Covalent Organic Framework: A Promising Avenue for Hydrogen Storage**

Preeti Beniwal<sup>a</sup>, T. J. Dhillip Kumar<sup>\*a</sup>

<sup>a</sup>Department of Chemistry, Indian Institute of Technology Ropar, Rupnagar 140001, India

\*Corresponding author email: [dhillip@iitrpr.ac.in](mailto:dhillip@iitrpr.ac.in)

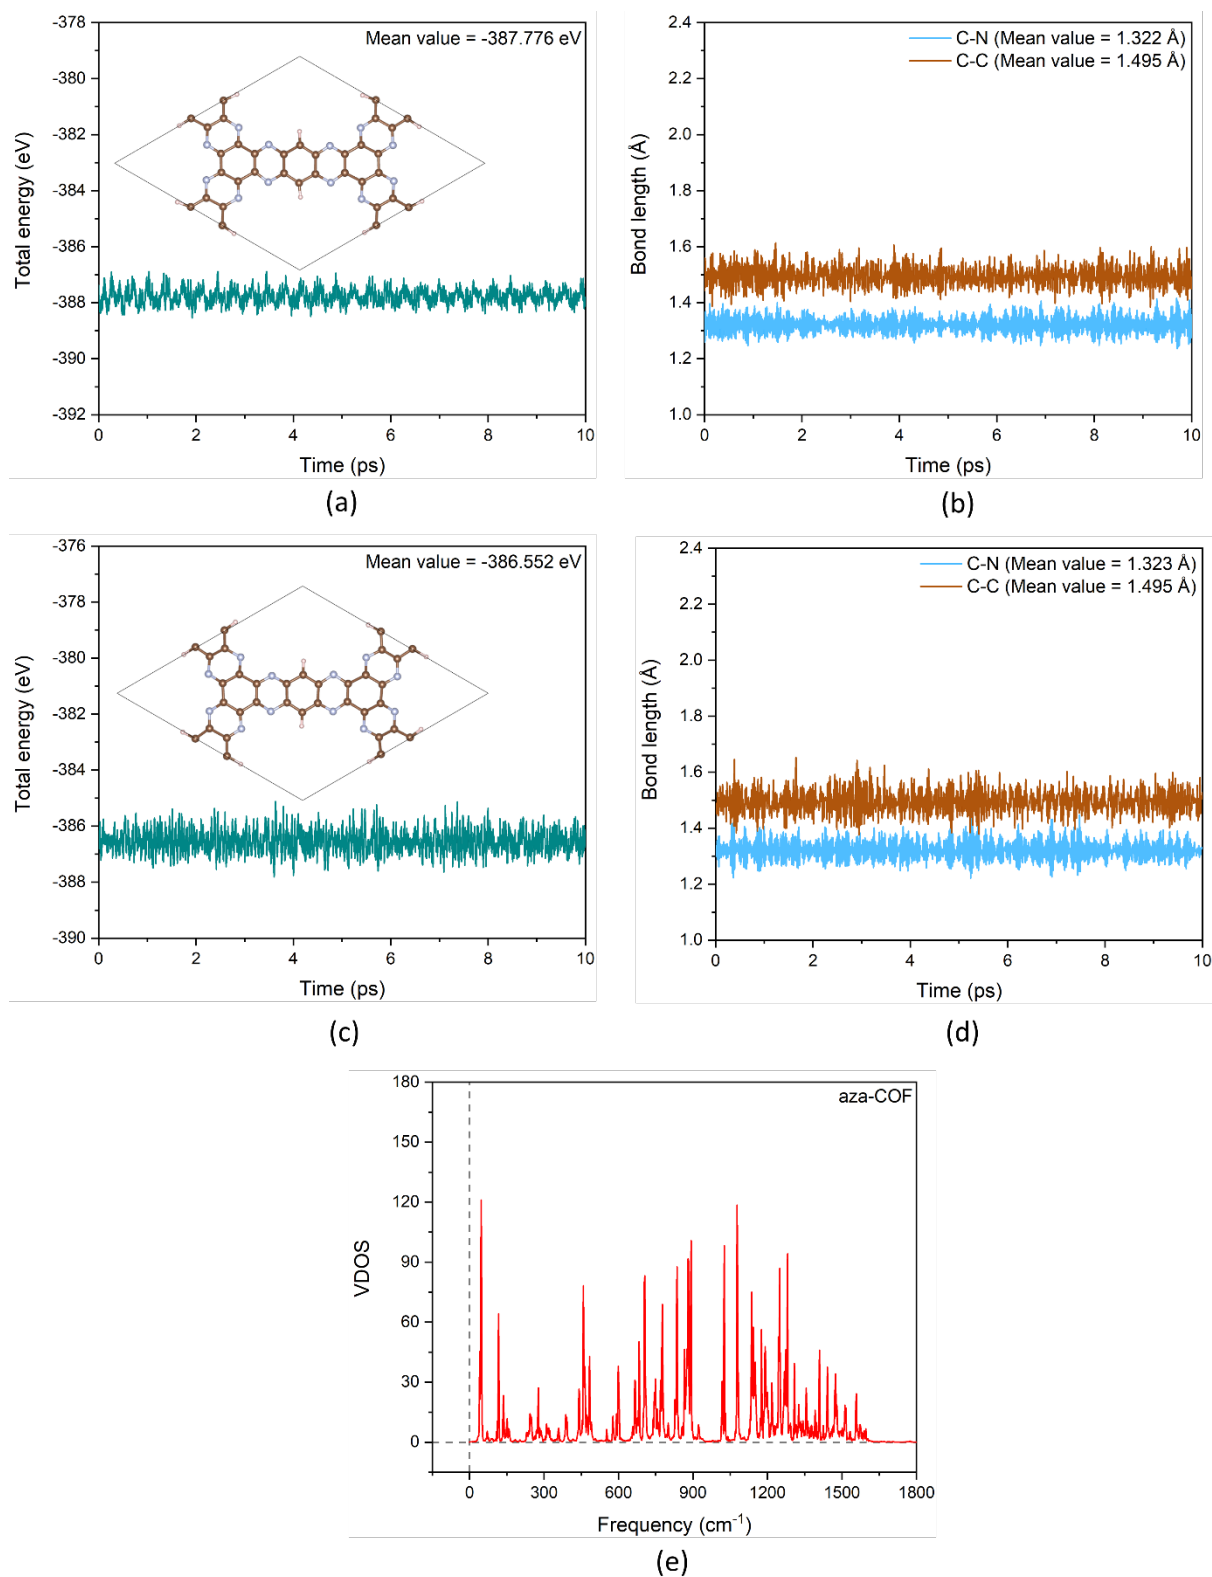

Figure S1: (a) Total energy and (b) different bond lengths fluctuations during the AIMD simulation at 300 K of aza-COF. (c) Total energy and (d) different bond lengths fluctuations during the AIMD simulation at 500 K of aza-COF. Insets of Figure S1a and S1c displays the final snapshot of aza-COF after 10 ps at 300 K and 500 K, respectively. (e) VDOS vs frequency plot at 300 K of aza-COF.

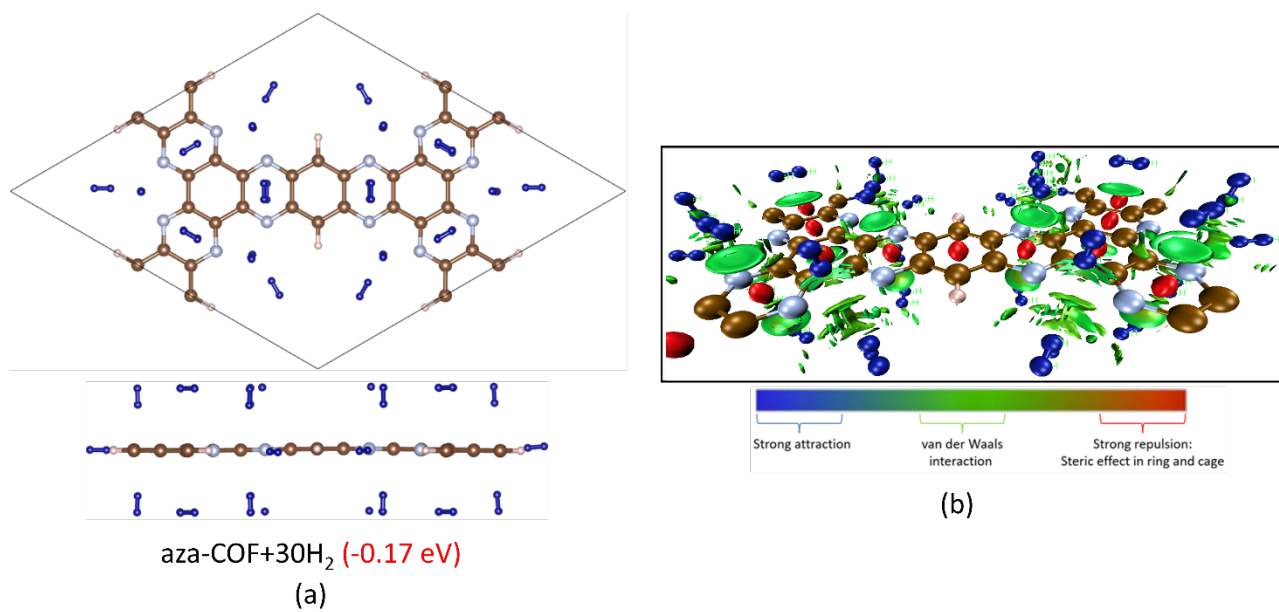

Figure S2: (a) Optimized structure of aza-COF+30H<sub>2</sub>. (b) NCI isosurface mapped for aza-COF+30H<sub>2</sub>.

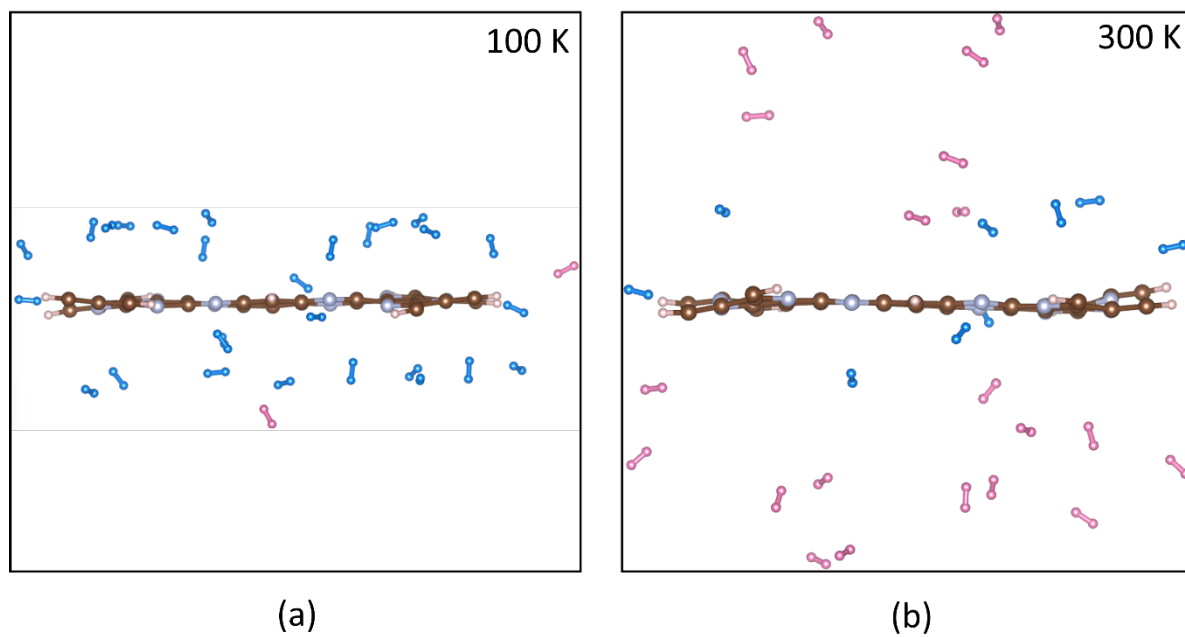

Figure S3: Snapshot of aza-COF+30H<sub>2</sub> after 10 ps of AIMD simulations at (a) 100 K and (b) 300 K. H<sub>2</sub> molecule color representation: Cyan-2.5 < d < 4.0 Å and pink- d > 4.0 Å. d denotes the distance of H<sub>2</sub> molecules from the surface of framework.

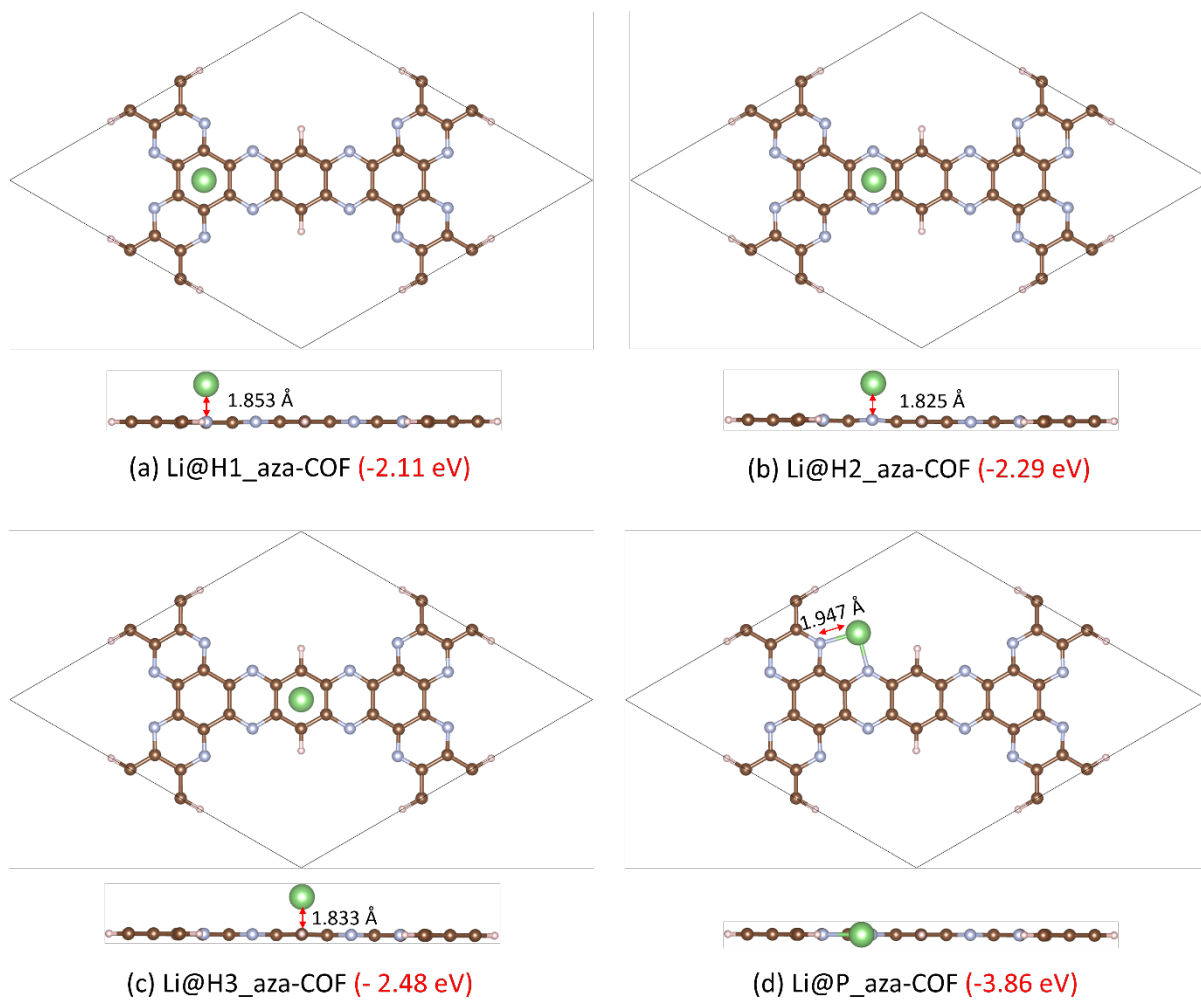

Figure S4: Optimized structures of Li doped at different binding sites of aza-COF: (a) H1, (b) H2, (c) H3, and (d) P, with respective binding energy.

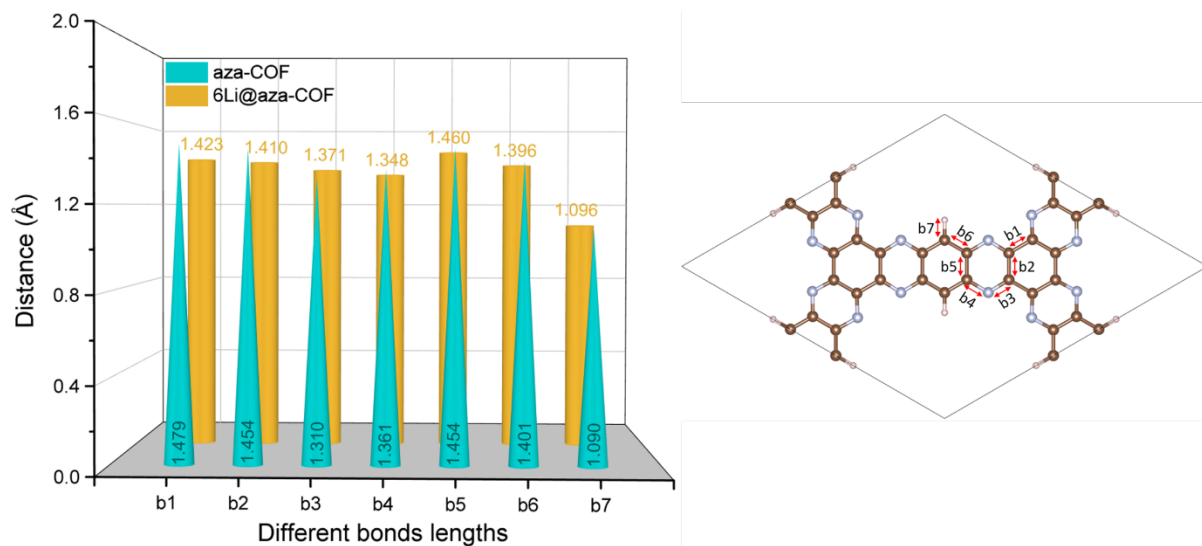

Figure S5: Different bond lengths of aza-COF and 6Li@aza-COF.

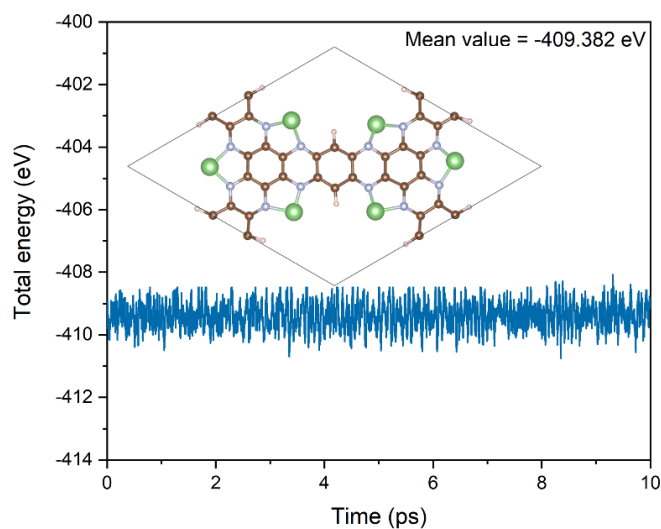

(a)

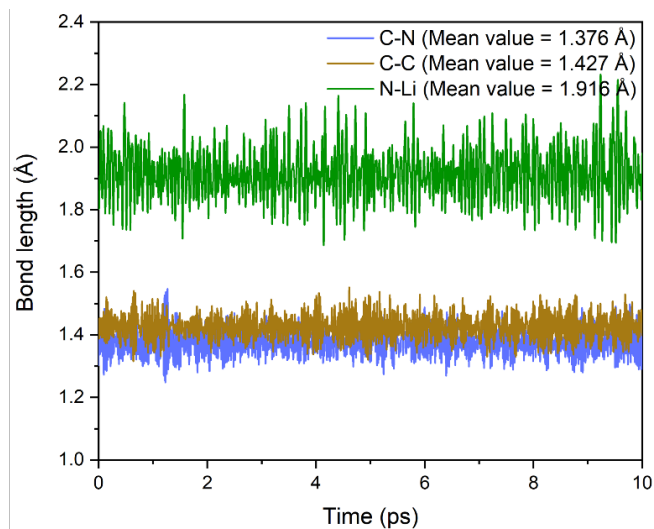

(b)

Figure S6: (a) Total energy and (b) different bond lengths fluctuations during the AIMD simulation at 500 K of 6Li@aza-COF. Inset of Figure S1a displays the final snapshot of 6Li@aza-COF after 10 ps.

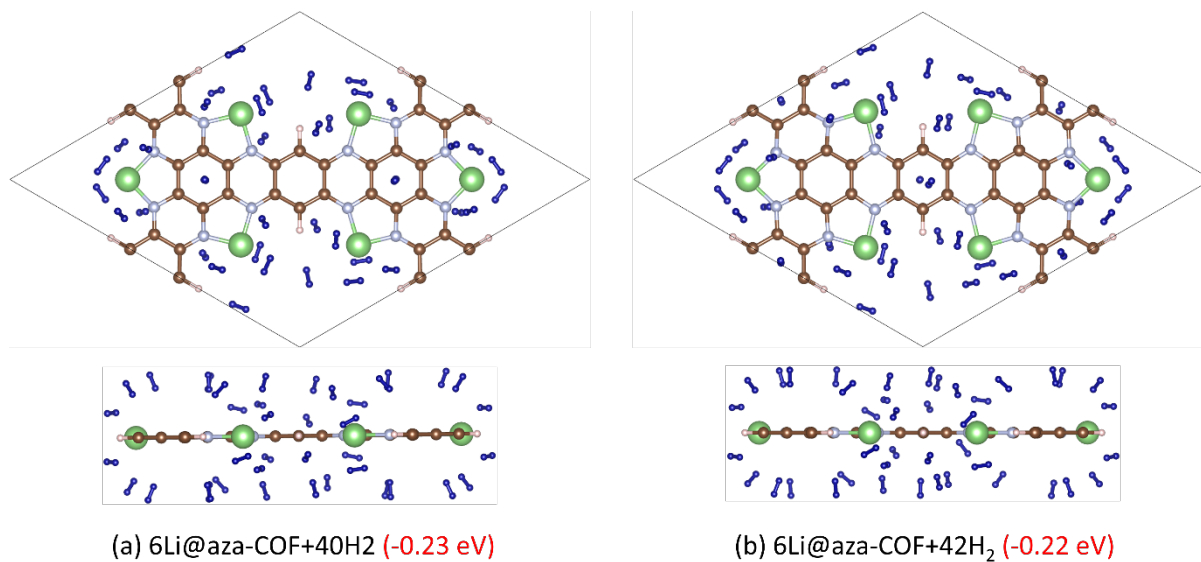

Figure S7: Optimized structures of (a) 6Li@aza-COF+40H<sub>2</sub> and (b) 6Li@aza-COF+42H<sub>2</sub> configurations.



Table S1: Bader charges on C, N, H and Li atoms in aza-COF and 6Li@aza-COF.

| Atoms | aza-COF  | 6Li@aza-COF |
|-------|----------|-------------|
| C1    | 0.57657  | 0.42707     |
| C2    | 0.59027  | 0.43589     |
| C3    | 0.67658  | 0.43028     |
| C4    | 0.54243  | 0.44283     |
| C5    | 0.57684  | 0.42945     |
| C6    | 0.58547  | 0.43681     |
| C7    | 0.57657  | 0.42716     |
| C8    | 0.59027  | 0.43495     |
| C9    | 0.67658  | 0.42980     |
| C10   | 0.54243  | 0.44322     |
| C11   | 0.57684  | 0.42944     |
| C12   | 0.58548  | 0.43666     |
| C13   | 0.43495  | 0.44631     |
| C14   | 0.46144  | 0.52029     |
| C15   | 0.43824  | 0.42128     |
| C16   | 0.43733  | 0.47913     |
| C17   | 0.47821  | 0.44683     |
| C18   | 0.47821  | 0.51008     |
| C19   | 0.48728  | 0.44599     |
| C20   | 0.51286  | 0.52076     |
| C21   | 0.43733  | 0.42177     |
| C22   | 0.43824  | 0.47892     |
| C23   | 0.47821  | 0.44705     |
| C24   | 0.47821  | 0.50971     |
| C25   | -0.03318 | -0.04294    |
| C26   | -0.03318 | -0.03964    |
| C27   | 0.01336  | 0.00051     |
| C28   | 0.01336  | 0.00231     |
| C29   | 0.01336  | 0.00040     |
| C30   | 0.01336  | 0.00218     |
| N1    | -1.10694 | -1.31947    |
| N2    | -1.10694 | -1.32068    |
| N3    | -1.12677 | -1.32603    |
| N4    | -1.12677 | -1.3268     |
| N5    | -1.10690 | -1.31699    |
| N6    | -1.10690 | -1.32173    |
| N7    | -1.10694 | -1.31918    |
| N8    | -1.10694 | -1.32076    |
| N9    | -1.12677 | -1.32632    |
| N10   | -1.12677 | -1.32717    |
| N11   | -1.10690 | -1.31741    |
| N12   | -1.10690 | -1.32119    |
| H1    | 0.12766  | -0.03653    |
| H2    | 0.12766  | -0.03834    |
| H3    | 0.11575  | -0.04517    |

|     |         |          |
|-----|---------|----------|
| H4  | 0.11575 | -0.04493 |
| H5  | 0.11575 | -0.04499 |
| H6  | 0.11552 | -0.04502 |
| Li1 |         | 0.89082  |
| Li2 |         | 0.89023  |
| Li3 |         | 0.89019  |
| Li4 |         | 0.89098  |
| Li5 |         | 0.89099  |
| Li6 |         | 0.89084  |

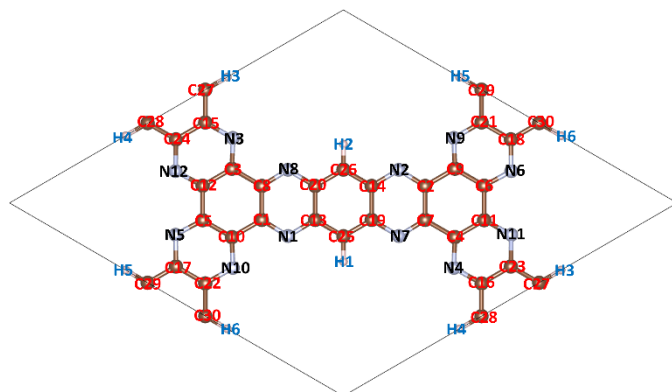

aza-COF

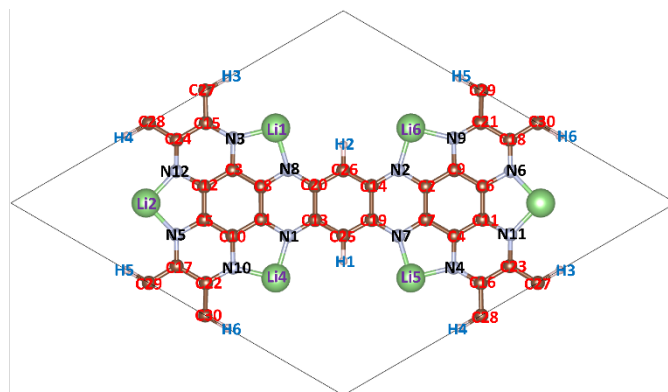

6Li@aza-COF

Table S2: Bader charges on Li and H atoms of adsorbed H<sub>2</sub> molecules in 6Li@aza-COF and 6Li@aza-COF+6H<sub>2</sub>.

| Configurations              | Li atom | H atom (H <sub>2</sub> molecules) |
|-----------------------------|---------|-----------------------------------|
| 6Li@aza-COF                 | 0.89082 |                                   |
|                             | 0.89023 |                                   |
|                             | 0.89019 |                                   |
|                             | 0.89098 |                                   |
|                             | 0.89099 |                                   |
|                             | 0.89084 |                                   |
| 6Li@aza-COF+6H <sub>2</sub> | 0.87432 | 0.04097                           |
|                             | 0.87313 | -0.03889                          |
|                             | 0.87317 | -0.04417                          |
|                             | 0.87388 | 0.04660                           |
|                             | 0.87460 | 0.03858                           |
|                             | 0.87434 | -0.03629                          |
|                             |         | -0.03463                          |
|                             |         | 0.03723                           |
|                             |         | -0.04121                          |
|                             |         | 0.04331                           |
|                             |         | -0.03697                          |
|                             |         | 0.03896                           |
